# Supplementary material for: Functional role of SGK3 in PI3K/Pten driven liver tumor development
Source: Springer Nature journal article supplement (doi:10.1186/s12885-019-5551-2), 2019-04-11
Supplement: MOESM1 [file 16650060]

**Supplementary Table 1: Western blotting (WB) and Immunohistochemistry (IHC) antibody information**

| <b>Antibody</b>             | <b>Company</b>            | <b>Catalog number</b> | <b>Dilution</b> | <b>Method</b> |
|-----------------------------|---------------------------|-----------------------|-----------------|---------------|
| GAPDH                       | EMD Millpore              | MAB374                | 1:10000         | WB            |
| SGK3                        | Cell signaling technology | 8573                  | 1:1000          | WB            |
| c-Met                       | Abcam                     | ab59884               | 1:100           | WB            |
| Pten                        | Cell signaling technology | 9188                  | 1:1000          | WB            |
| Phospho-AKT <sup>S473</sup> | Cell signaling technology | 3787                  | 1:1000          | WB            |
| Phospho-AKT <sup>T308</sup> | Cell signaling technology | 13038                 | 1:1000          | WB            |
| AKT                         | Cell signaling technology | 9272                  | 1:1000          | WB            |
| Phospho-4E-BP1              | Cell signaling technology | 2855                  | 1:2000          | WB            |
| Phospho-RPS6                | Cell signaling technology | 5363                  | 1:2000          | WB            |
| RPS6                        | Cell signaling technology | 2217                  | 1:2000          | WB            |
| Phospho-ERK                 | Cell signaling technology | 4370                  | 1:1000          | WB            |
| ERK                         | Cell signaling technology | 9102                  | 1:1000          | WB            |
| p-FoxO1                     | Cell signaling technology | 84192                 | 1:1000          | WB            |
| p-GSK3 $\beta$              | Cell signaling technology | 9336                  | 1:1000          | WB            |
| Active $\beta$ -Catenin     | Cell signaling technology | 4270                  | 1:1000          | WB            |
| $\beta$ -Catenin            | BD Biosciences            | BD610153              | 1:2000          | WB            |
| CCND1                       | Abcam                     | ab134175              | 1:20000         | WB            |
| $\beta$ -actin              | Sigma-Aldrich             | A5441                 | 1:4500          | WB            |
| E-Cadherin                  | BD Biosciences            | 610181                | 1:500           | IHC           |
| Vimentin                    | Cell signaling technology | 5741                  | 1:100           | IHC           |
| $\beta$ -Catenin            | BD Biosciences            | BD610153              | 1:400           | IHC           |
| Glutamine Synthetase        | BD Biosciences            | BD 610518             | 1:500           | IHC           |
| ACC                         | Cell Signaling Technology | 3676                  | 1:100           | IHC           |
| FASN                        | Cell Signaling Technology | 3180                  | 1:150           | IHC           |
| Ki67                        | Thermo Scientific         | MA5-14520             | 1:150           | IHC           |

**Supplementary Table 2: Cell Line Information**

| <b>Name</b> | <b>Source</b>  | <b>Citation</b>    | <b>Cat no.</b> | <b>Authentication test method/Time</b> | <b>test method for mycoplasma contamination</b> |
|-------------|----------------|--------------------|----------------|----------------------------------------|-------------------------------------------------|
| HuH7        | JCRB Cell Bank | Pubmed:<br>6286115 | JCRB0403       | STR 3/7/2016                           | PCR                                             |
| HLE         | JCRB Cell Bank | PubMed:<br>52570   | JCRB0404       | STR 3/7/2016                           | PCR                                             |

**Supplementary Table 3: Clinicopathological features of HCC Patients**

| Variables                                       | Features           |                    |
|-------------------------------------------------|--------------------|--------------------|
|                                                 | HCCB <sup>a</sup>  | HCCP <sup>b</sup>  |
| No. of patients                                 | 24                 | 28                 |
| Male                                            | 18                 | 18                 |
| Female                                          | 6                  | 10                 |
| Age (Mean $\pm$ SD)                             | 63.8<br>$\pm$ 10.2 | 66.0<br>$\pm$ 10.8 |
| Etiology                                        |                    |                    |
| HBV                                             | 10                 | 12                 |
| HCV                                             | 8                  | 10                 |
| Ethanol                                         | 6                  | 6                  |
| Cirrhosis                                       |                    |                    |
| +                                               | 18                 | 20                 |
| -                                               | 6                  | 8                  |
| Tumor size                                      |                    |                    |
| > 5 cm                                          | 16                 | 18                 |
| < 5 cm                                          | 8                  | 10                 |
| Edmondson and Steiner grade                     |                    |                    |
| II                                              | 8                  | 5                  |
| III                                             | 10                 | 11                 |
| IV                                              | 6                  | 12                 |
| Alpha-fetoprotein secretion                     |                    |                    |
| > 300 ng/ml of serum                            | 14                 | 19                 |
| < 300 ng/ml of serum                            | 10                 | 9                  |
| Survival after partial liver resection (months) |                    |                    |
| Means $\pm$ SD                                  | 63.4<br>$\pm$ 22.2 | 16.8<br>$\pm$ 12.2 |

<sup>a</sup>HCCB, HCC with better prognosis/longer survival (survival  $\geq$ 3 years following partial liver resection).

<sup>b</sup>HCCP, HCC with poorer prognosis/shorter survival (survival <3 years following partial liver resection).
