# Supplementary material for: Functional role of SGK3 in PI3K/Pten driven liver tumor development
Source: Springer Nature journal article supplement (doi:10.1186/s12885-019-5551-2), 2019-04-11
Supplement: MOESM2 [file 16650060]

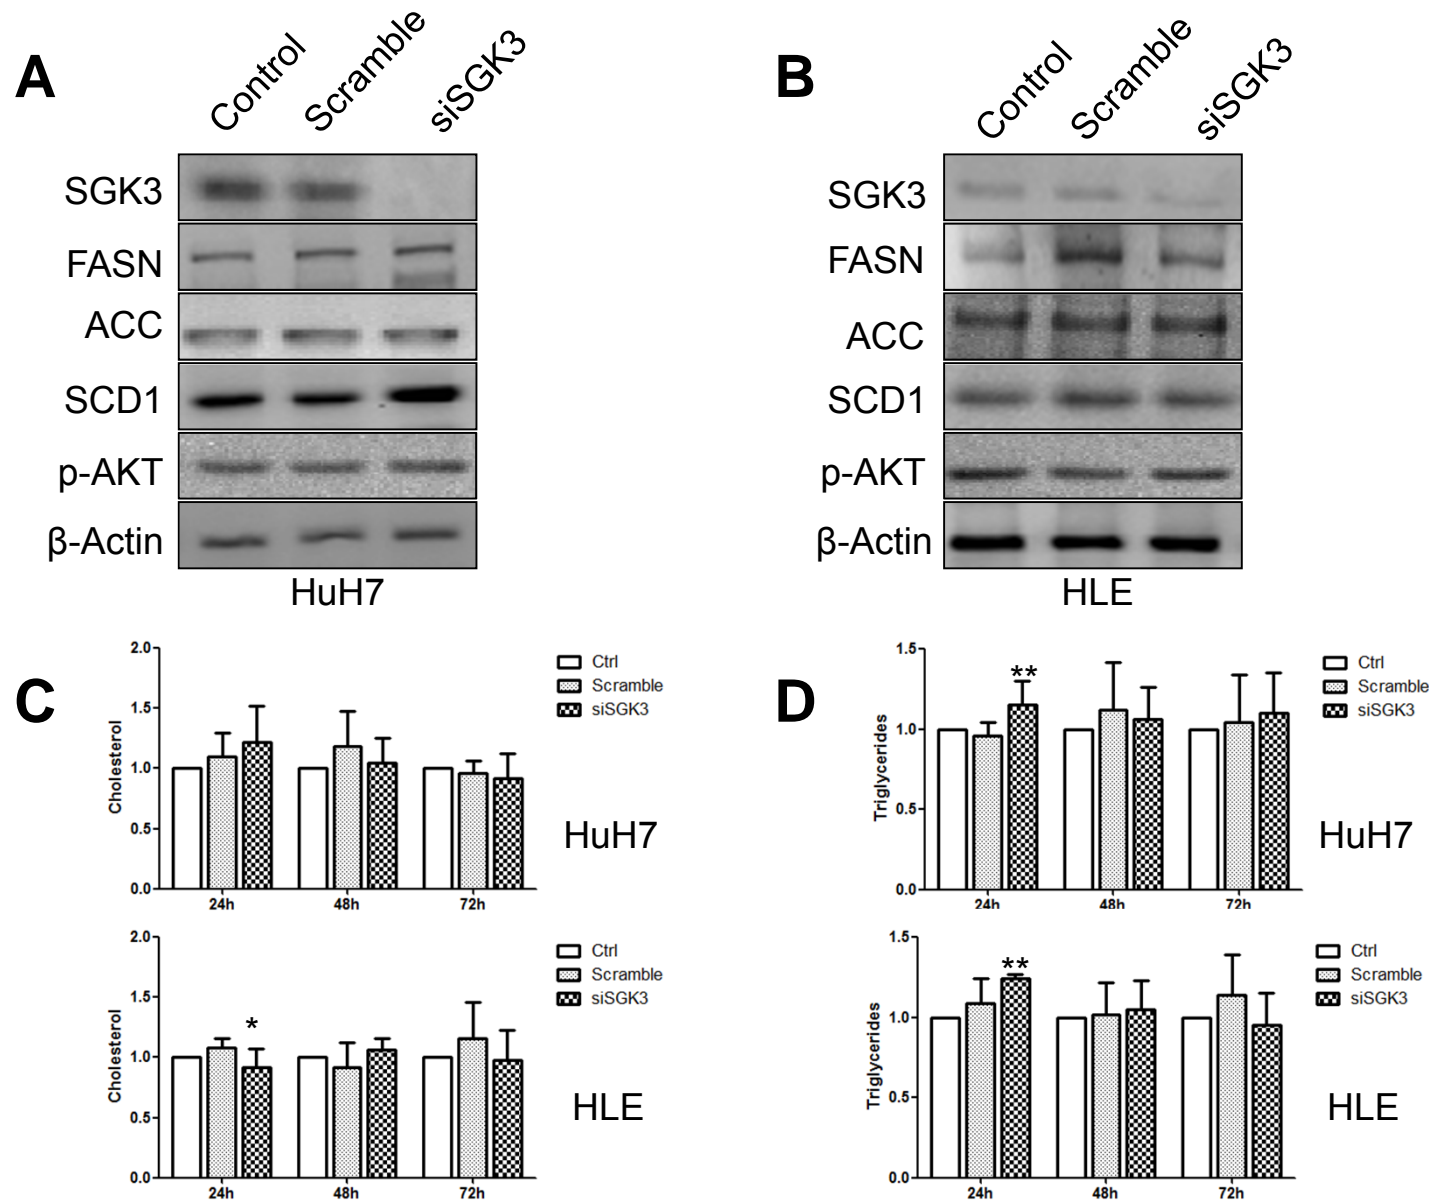

**Supplementary Figure 1: SGK3 does not regulate lipogenesis in human HCC cell lines. (A)** Suppression of *SGK3* expression by specific siRNA for 48h does not affect levels of FASN, ACC, and SCD1 lipogenic proteins and the master lipogenesis inducer activated/phosphorylated (p) AKT in HuH7 cells, as assessed by Western blot analysis.  $\beta$ -Actin was used as a loading control. **(B)** Equivalent results were obtained in HLE cells. **(C, D)** Knockdown of *SGK3* by siRNA for 24 h and 48h does not affect triglycerides and cholesterol levels in the two cell lines. Tukey-Kramer's test: \*  $P < 0.05$ ; \*\*  $P < 0.01$ .

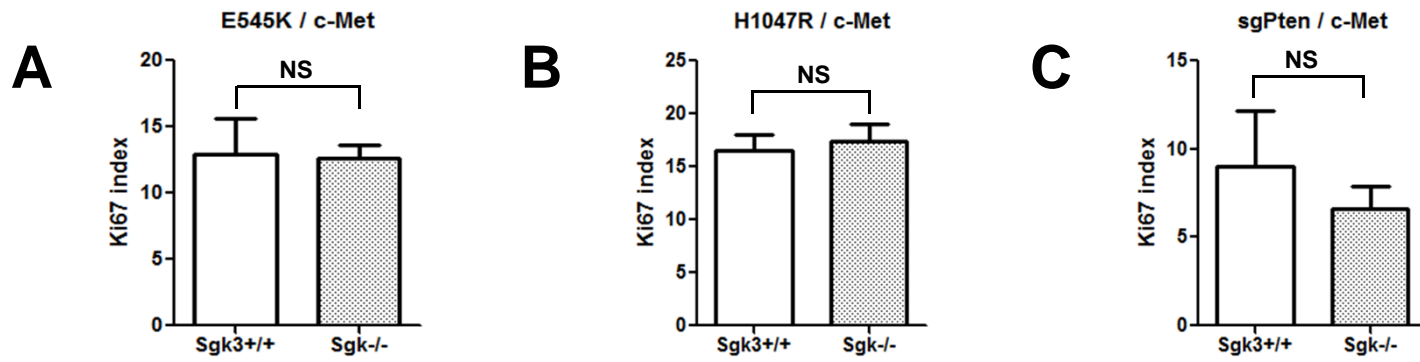

**Supplementary Figure 2: Quantification of Ki67 in *Sgk3*<sup>+/+</sup> and *Sgk3*<sup>-/-</sup> mice injected with E545K, H1047R, or sgPten and c-Met constructs. (A) E545K/c-Met ( $P = 0.9198$ ); (B) H1047R/c-Me ( $P = 0.6839$ ); (C) sgPten/c-Met ( $P = 0.4951$ ).**

**A**

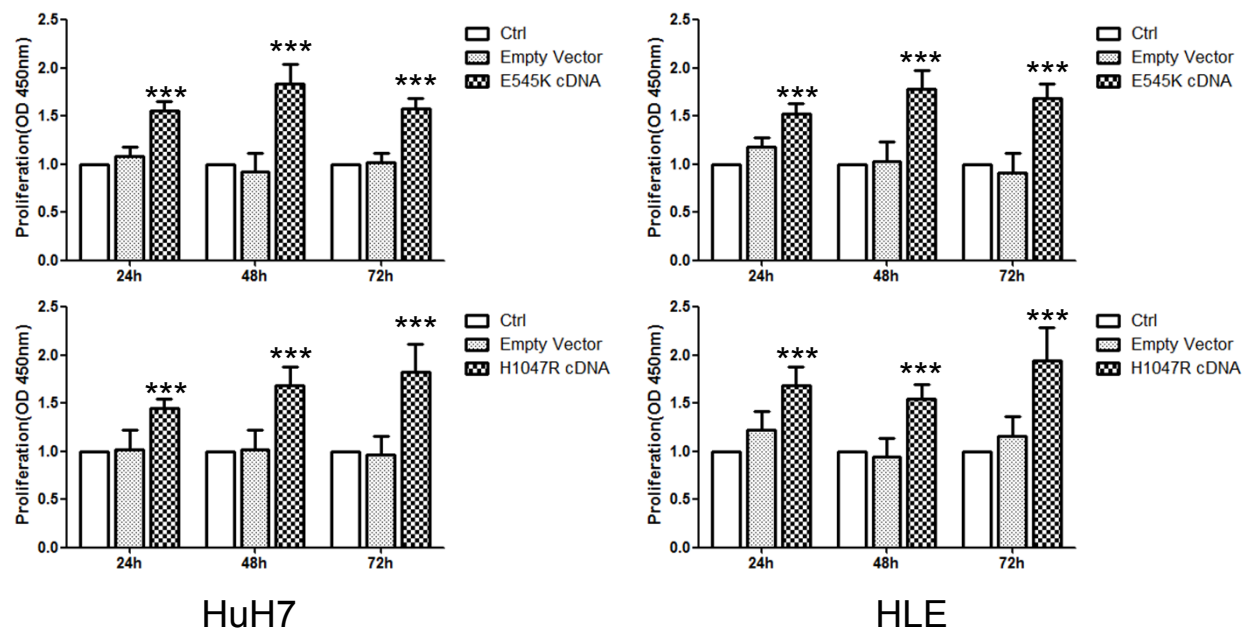

**B**

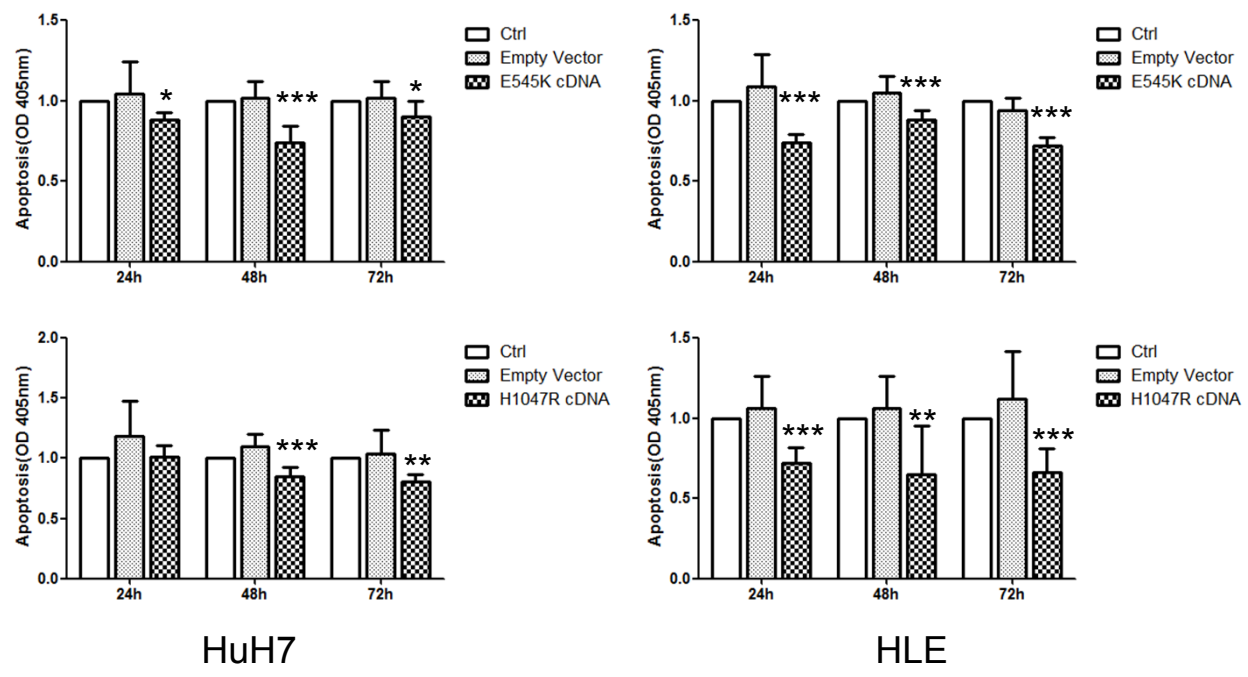

**Supplementary Figure 3. Effect of the PIK3CA mutants on cell proliferation and apoptosis of HCC cell lines. (A) Cell proliferation in the HuH7 and HLE cell lines. (B) Apoptosis. Tukey-Kramer's test: \*  $P < 0.05$ ; \*\*  $P < 0.01$ ; \*\*\*  $P < 0.001$ .**

**A**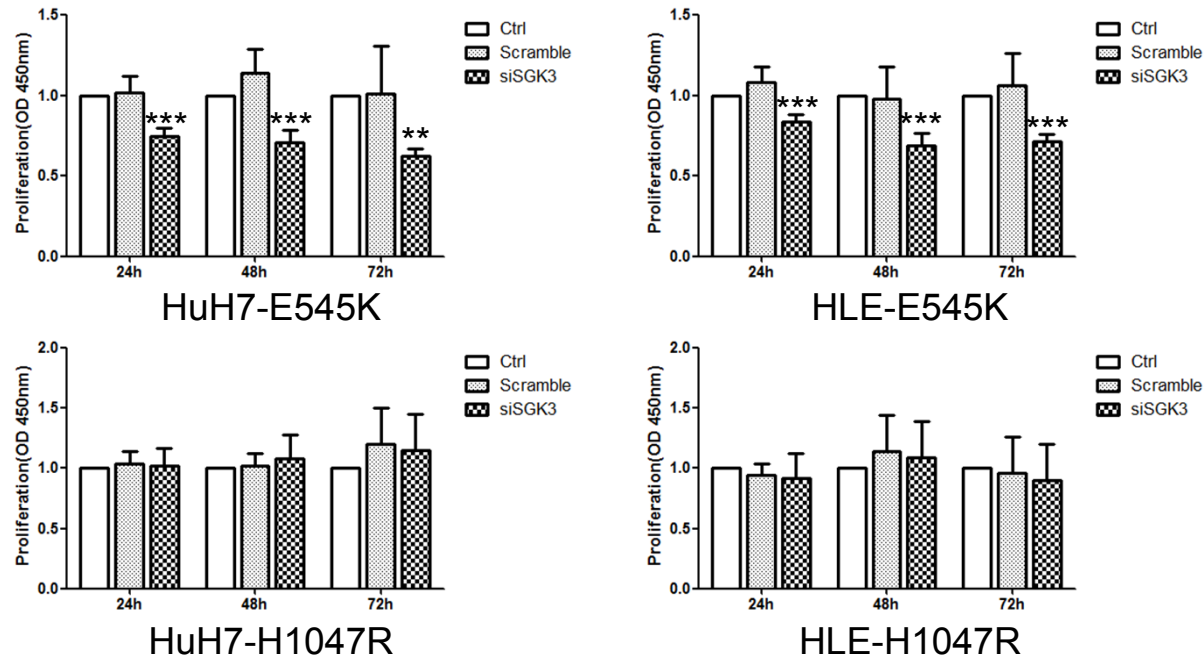**B**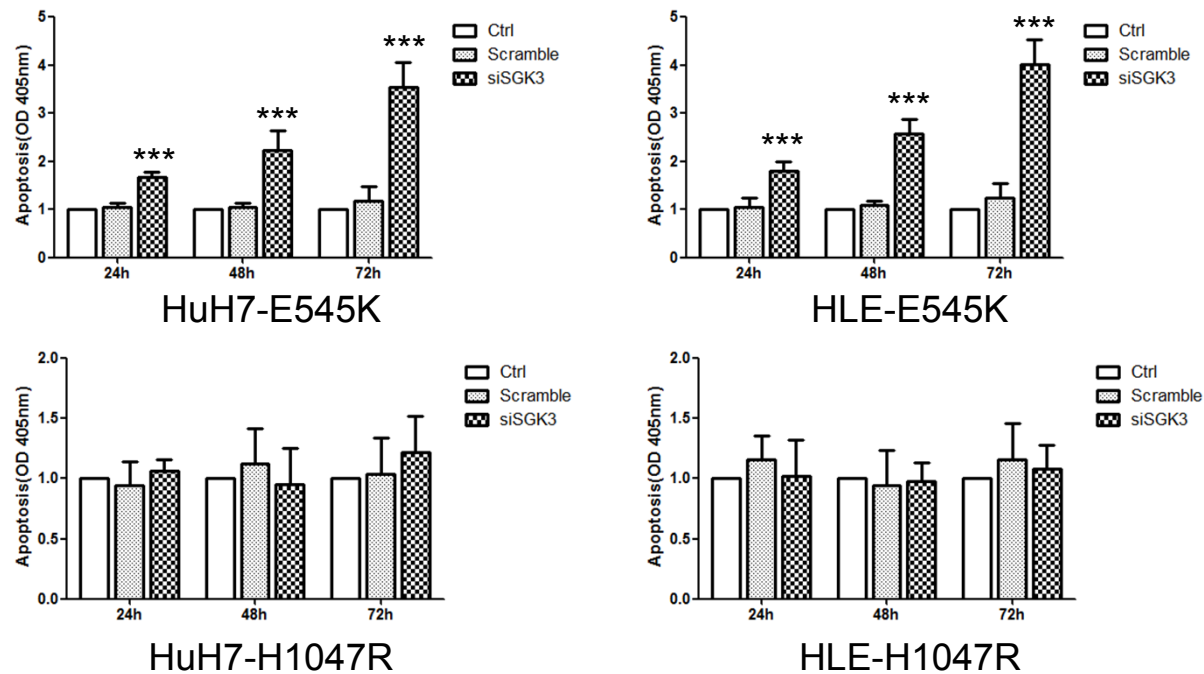

**Supplementary Figure 4.**  
**Effect of silencing of SGK3 by siRNA on cell proliferation and apoptosis of HCC cell lines stably transfected with E545K or H1047R mutant.** (A) Cell proliferation in the HuH7 and HLE cell lines stably transfected with E545K or H1047R mutant. (B) Apoptosis. Tukey-Kramer's test: \*  $P < 0.05$ ; \*\*  $P < 0.01$ ; \*\*\*  $P < 0.001$ .

**A**

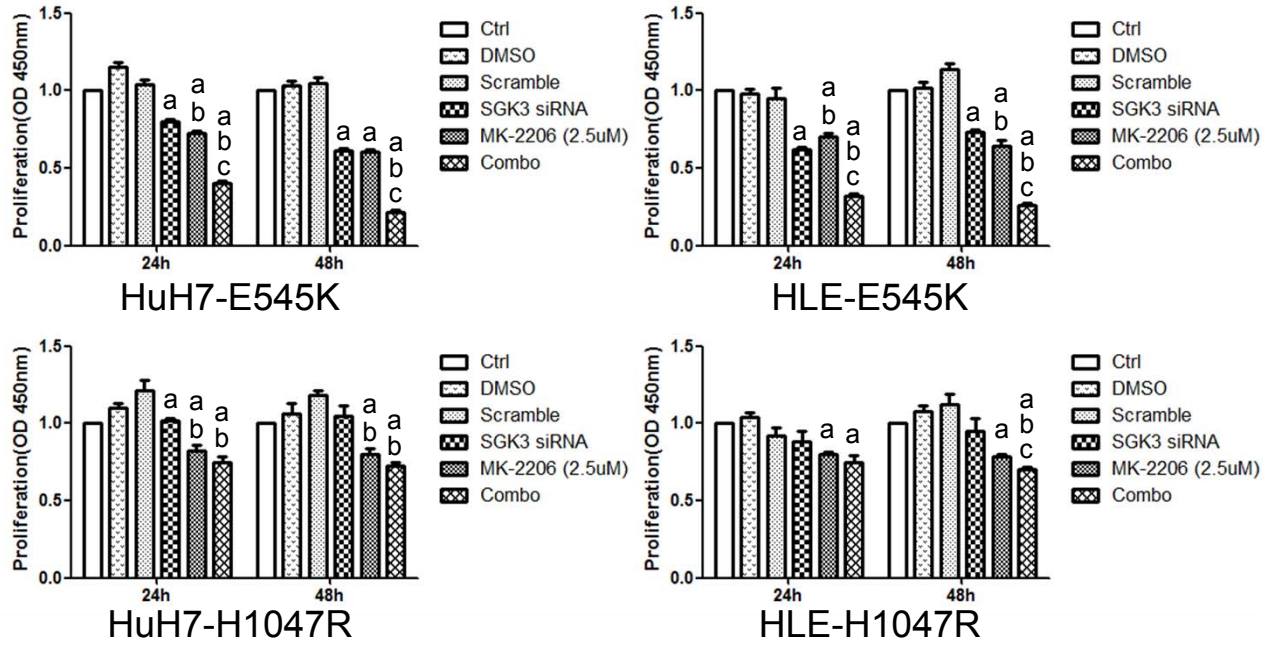

**B**

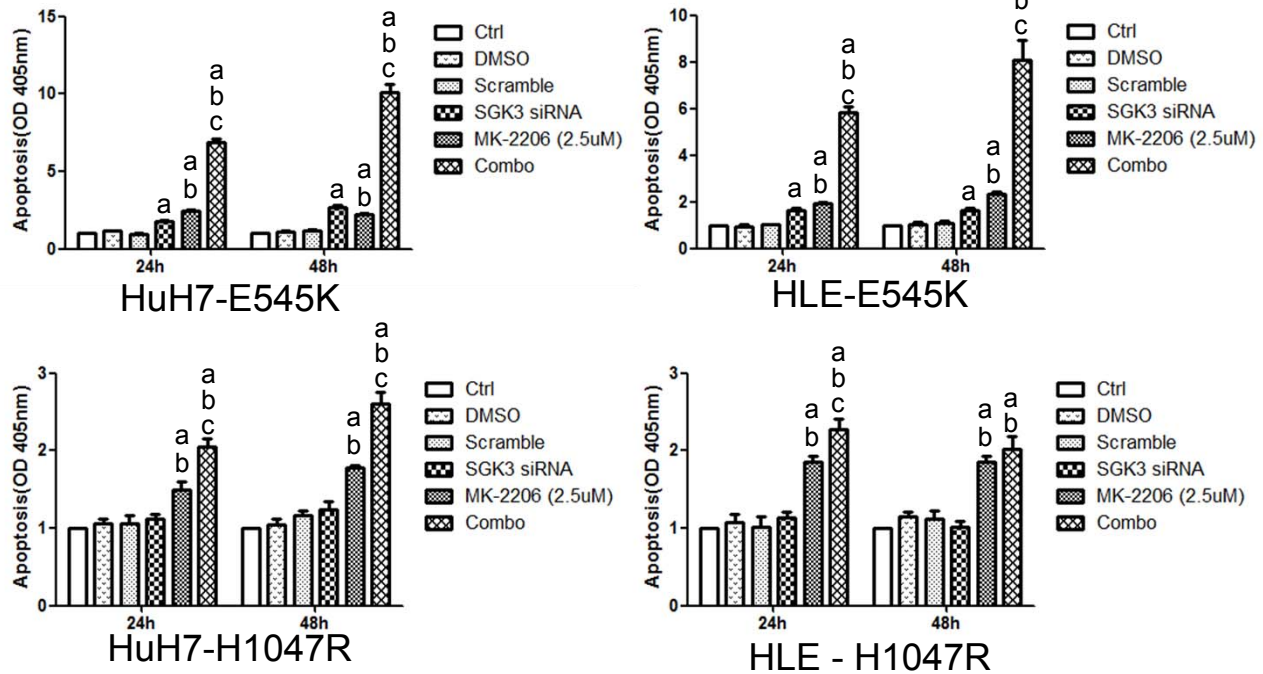

**Supplementary Figure 5. Effect of AKT inhibitor MK-2206 on cell proliferation and apoptosis of HCC cell lines stably transfected with E545K or H1047R mutant.** (A) Cell proliferation in the HuH7 and HLE cell lines stably transfected with E545K or H1047R mutant. (B) Apoptosis. Tukey Kramer test,  $P < 0.05$ , a: vs Scrmble treated cells; b: vs SGK3 siRNA; c: vs MK-2206 (2.5  $\mu$ m).
